# Supplementary material for: Magnetic ground state of nanosized β-Fe2O3and its remarkable electronic features
Source: Royal Society of Chemistry journal article supplement (doi:10.1039/c5ra07484c), 2015-01-01
Supplement: c5ra07484c1.pdf [file c5ra07484c1.pdf]

## Supporting Information

for

### Magnetic ground state of nanosized $\beta$ -Fe<sub>2</sub>O<sub>3</sub> and its remarkable electronic features

*Ondřej Malina,<sup>1</sup> Jiří Tuček,<sup>1,\*</sup> Petr Jakubec,<sup>1</sup> Josef Kašlík,<sup>1</sup> Ivo Medřík,<sup>1</sup> Hiroko Tokoro,<sup>2</sup> Marie  
Yoshikiyo,<sup>2</sup> Asuka Namai,<sup>2</sup> Sin-ichi Ohkoshi,<sup>2</sup> and R. Zbořil,<sup>1,\*</sup>*

<sup>1</sup> Regional Centre of Advanced Technologies and Materials, Departments of Physical Chemistry  
and Experimental Physics, Faculty of Science, Palacky University, Slechtitelu 11, 783 71  
Olomouc, Czech Republic

<sup>2</sup> Department of Chemistry, School of Science, The University of Tokyo, 7-3-1 Hongo, Bunkyo-  
ku, Tokyo 113-0033, Japan

\* Corresponding authors: Phone: +420 585634337, Fax: +420 585634761, E-mail address:  
radek.zboril@upol.cz (Radek Zbořil); Phone: +420 585634950, Fax: +420 585634958, E-mail  
address: jiri.tucek@upol.cz (Jiří Tuček).

Number of pages: 5

Number of figures: 1

Number of tables: 2

## Supporting Figures

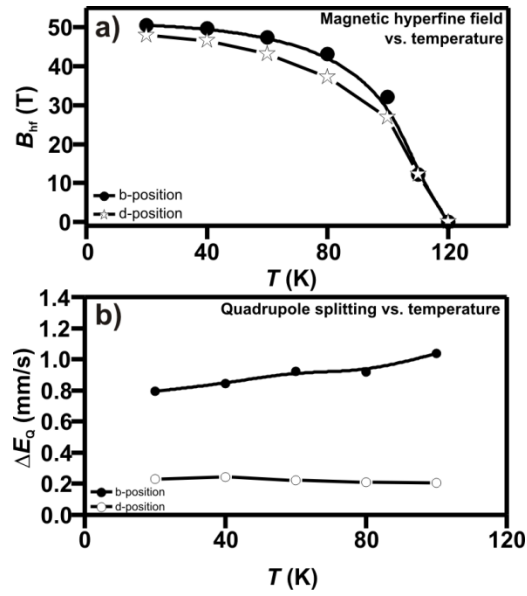

**Figure S1.** a) Temperature behavior of the hyperfine magnetic field ( $B_{\text{hf}}$ ) for both sites and b) temperature evolution of the quadrupole splitting ( $\Delta E_Q$ ) for both sites below the Néel temperature.

## Supporting Tables

**Table S1.** Values of the Mössbauer hyperfine parameters derived from the zero-field and in-field Mössbauer spectra of the prepared  $\beta$ -Fe<sub>2</sub>O<sub>3</sub> phase recorded at various temperatures where  $T$  is the temperature of the measurement,  $B_{\text{ext}}$  is the external magnetic field,  $\delta$  is the isomer shift,  $\Delta E_Q$  is the quadrupole splitting,  $B_{\text{hf}}$  is hyperfine magnetic field,  $B_{\text{eff}}$  is the effective hyperfine magnetic field (i.e.,  $B_{\text{eff}}$  is vector sum of the external magnetic field  $B_{\text{ext}}$  and the hyperfine field  $B_{\text{hf}}$ ), and RA is relative spectra area of each component.

| $T$ | $B_{\text{ext}}$ | Component | $\delta$   | $\Delta E_Q$ | $B_{\text{hf}}$ | $B_{\text{eff}}$ | RA      | Assignment    |
|-----|------------------|-----------|------------|--------------|-----------------|------------------|---------|---------------|
|     |                  |           | $\pm 0.01$ | $\pm 0.01$   | $\pm 0.3$       | $\pm 0.3$        | $\pm 1$ |               |
| (K) | (T)              |           | (mm/s)     | (mm/s)       | (T)             | (T)              | (%)     |               |
| 20  | 0                | Sextet 1  | 0.50       | 0.23         | 47.9            | -                | 75      | d-sites       |
|     |                  | Sextet 2  | 0.49       | 0.80         | 50.6            | -                | 25      | b-sites       |
| 40  | 0                | Sextet 1  | 0.50       | 0.24         | 46.6            | -                | 75      | d-sites       |
|     |                  | Sextet 2  | 0.50       | 0.85         | 49.8            | -                | 25      | b-sites       |
| 60  | 0                | Sextet 1  | 0.50       | 0.22         | 43.1            | -                | 75      | d-sites       |
|     |                  | Sextet 2  | 0.51       | 0.92         | 47.4            | -                | 25      | b-sites       |
| 80  | 0                | Sextet 1  | 0.48       | 0.21         | 37.3            | -                | 45      | d-sites       |
|     |                  | Sextet 2  | 0.47       | 0.92         | 43.1            | -                | 15      | b-sites       |
|     |                  | Singlet   | 0.48       | -            | -               | -                | 40      | relaxation c. |
| 100 | 0                | Sextet 1  | 0.49       | 0.21         | 26.8            | -                | 21      | d-sites       |
|     |                  | Sextet 2  | 0.48       | 1.04         | 32.1            | -                | 7       | b-sites       |
|     |                  | Singlet   | 0.48       | -            | -               | -                | 72      | relaxation c. |
| 110 | 0                | Doublet   | 0.47       | 0.75         | -               | -                | 17      |               |
|     |                  | Sextet    | 0.52       | 0.11         | 12.1            | -                | 83      |               |
| 120 | 0                | Doublet 1 | 0.47       | 0.68         | -               | -                | 75      | d-sites       |
|     |                  | Doublet 2 | 0.47       | 1.05         | -               | -                | 25      | b-sites       |
| 140 | 0                | Doublet 1 | 0.47       | 0.68         | -               | -                | 75      | d-sites       |
|     |                  | Doublet 2 | 0.46       | 1.07         | -               | -                | 25      | b-sites       |

|     |     |           |      |      |      |      |    |              |
|-----|-----|-----------|------|------|------|------|----|--------------|
| 160 | 0   | Doublet 1 | 0.46 | 0.68 | -    | -    | 75 | d-sites      |
|     |     | Doublet 2 | 0.45 | 1.05 | -    | -    | 25 | b-sites      |
| 180 | 0   | Doublet 1 | 0.45 | 0.69 | -    | -    | 75 | d-sites      |
|     |     | Doublet 2 | 0.44 | 1.07 | -    | -    | 25 | b-sites      |
| 200 | 0   | Doublet 1 | 0.45 | 0.73 | -    | -    | 75 | d-sites      |
|     |     | Doublet 2 | 0.43 | 0.92 | -    | -    | 25 | b-sites      |
| 220 | 0   | Doublet 1 | 0.42 | 0.70 | -    | -    | 75 | d-sites      |
|     |     | Doublet 2 | 0.41 | 1.13 | -    | -    | 25 | b-sites      |
| 240 | 0   | Doublet 1 | 0.41 | 0.68 | -    | -    | 75 | d-sites      |
|     |     | Doublet 2 | 0.40 | 1.06 | -    | -    | 25 | b-sites      |
| 260 | 0   | Doublet 1 | 0.39 | 0.73 | -    | -    | 75 | d-sites      |
|     |     | Doublet 2 | 0.40 | 0.94 | -    | -    | 25 | b-sites      |
| 280 | 0   | Doublet 1 | 0.39 | 0.69 | -    | -    | 75 | d-sites      |
|     |     | Doublet 2 | 0.39 | 1.02 | -    | -    | 25 | b-sites      |
| 300 | 0   | Doublet 1 | 0.37 | 0.68 | -    | -    | 75 | d-sites      |
|     |     | Doublet 2 | 0.37 | 1.07 | -    | -    | 25 | b-sites      |
| 5   | 0   | Sextet 1  | 0.50 | 0.25 | 48.7 | -    | 75 | d-sites      |
|     |     | Sextet 2  | 0.47 | 0.84 | 50.9 | -    | 25 | b-sites      |
|     | 1   | Sextet 1  | 0.52 | 0.25 | -    | 48.7 | 75 | d-sites      |
|     |     | Sextet 2  | 0.46 | 0.84 | -    | 50.9 | 25 | b-sites      |
|     | 2   | Sextet 1  | 0.52 | 0.24 | -    | 48.1 | 75 | d-sites      |
|     |     | Sextet 2  | 0.44 | 0.77 | -    | 50.5 | 25 | b-sites      |
|     | 3.5 | Sextet 1  | 0.48 | 0.29 | -    | 50.0 | 48 | A-sublattice |
|     |     | Sextet 2  | 0.51 | 0.25 | -    | 46.4 | 52 | B-sublattice |
|     | 5   | Sextet 1  | 0.47 | 0.32 | -    | 59.2 | 50 | A-sublattice |
|     |     | Sextet 2  | 0.48 | 0.20 | -    | 44.8 | 50 | B-sublattice |
|     | 8   | Sextet 1  | 0.47 | 0.27 | -    | 49.4 | 45 | A-sublattice |
|     |     | Sextet 2  | 0.49 | 0.25 | -    | 44.9 | 27 | B-sublattice |
|     |     | Sextet 3  | 0.48 | 0.13 | -    | 41.1 | 28 | B-sublattice |

**Table S2.** Values of the physical parameters derived from the Mössbauer spectra of the prepared  $\beta$ -Fe<sub>2</sub>O<sub>3</sub> sample above the Néel temperature, where  $\delta$  corresponds to the isomer shift,  $A(T)$  is the resonant area under the Mössbauer spectrum at a temperature  $T$ ,  $M_{\text{eff}}$  refers to an effective mass of the Mössbauer probed atom, and  $\Theta_D$  is the Debye temperature of the solid.

|                                                     | obtained parameters for<br>the d-position | obtained parameters for the b-<br>position |
|-----------------------------------------------------|-------------------------------------------|--------------------------------------------|
| $d\delta/dT$ (mm/s K <sup>-1</sup> )                | $-5.75 \times 10^{-4}$                    | $5.27 \times 10^{-4}$                      |
| $M_{\text{eff}}$ (amu)                              | 72                                        | 79                                         |
| $d\ln[A(T)/A(120 \text{ K})]/dT$ (K <sup>-1</sup> ) | $-3.50 \times 10^{-3}$                    | $-3.52 \times 10^{-3}$                     |
| $\Theta_D$ (K)                                      | 175                                       | 167                                        |
